# Supplementary material
Source: PubMed Central journal article supplement (PMC7212625)
Supplement: supp_RA119.010983_155706_2_supp_504777_q87mvr.pdf [file supp_RA119.010983_155706_2_supp_504777_q87mvr.pdf]

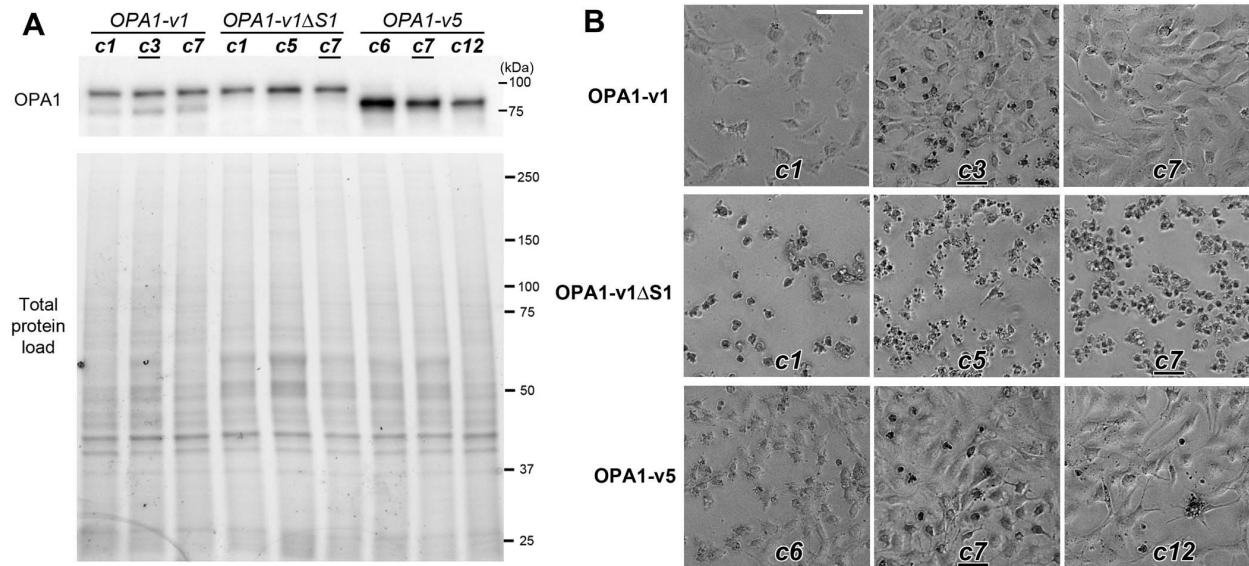

**Supp Fig. S1. Expression levels and sensitivity to H<sub>2</sub>O<sub>2</sub> in different clones of OPA1 variants.**

Three different clones of OPA1-v1 (c1, c3, and c7), OPA1-v1ΔS1 (c1, c5, and c7), and OPA1-v5 (c6, c7, and c12) were tested. (A) OPA1-v1-c3, OPA1-v1ΔS1-c7, and OPA1-v5-c7 were selected based on their expression levels similar to the overall OPA1 levels in WT MEFs. (B) Bright field images of different OPA1 variant clones incubated in 500 μM H<sub>2</sub>O<sub>2</sub> for 24 hours. All three clones of OPA1-v1ΔS1 were shrunk and detached, whereas clones of OPA1-v1 and OPA1-v5 were mostly well spread and attached. Scale bar: 100 μm.

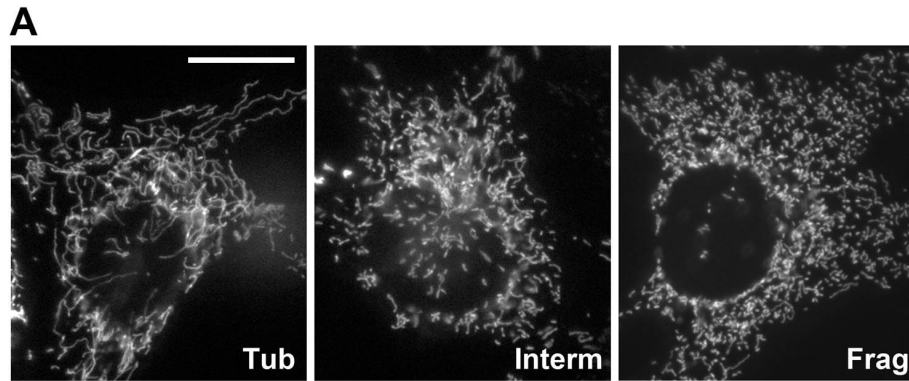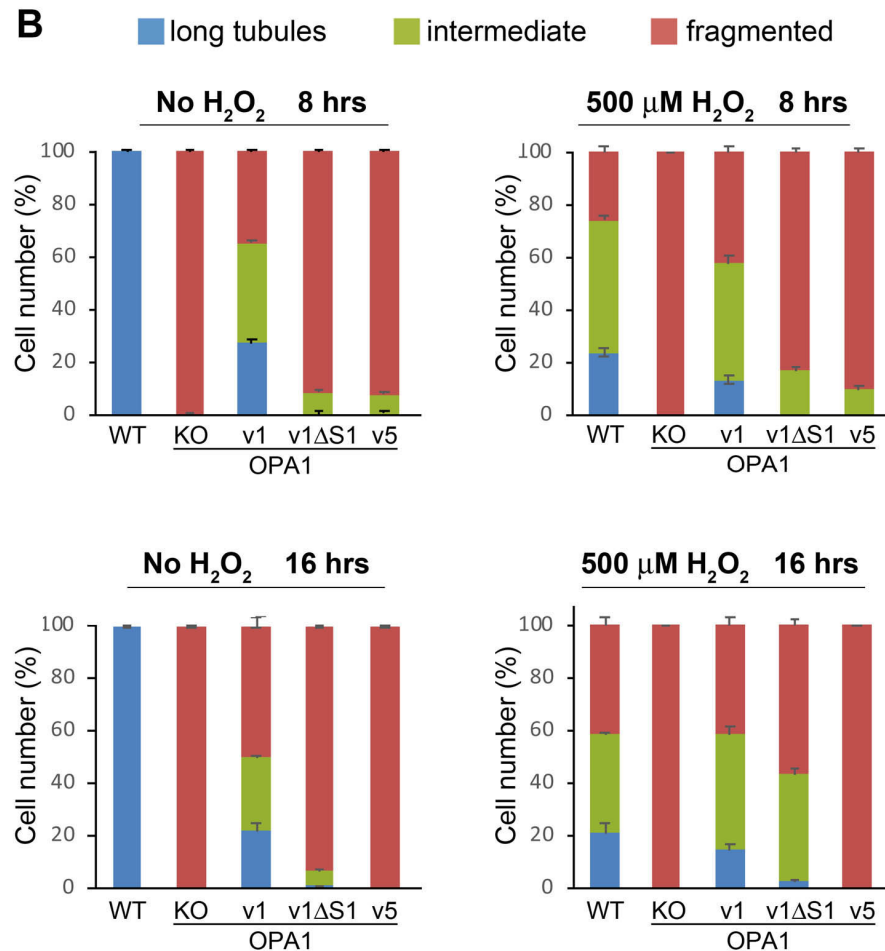

**Supp Fig. S2. Mitochondrial morphology of OPA1 variant cells in H<sub>2</sub>O<sub>2</sub> treatment under OXPHOS conditions.** (A) Representative tubular, intermediate, and fragmented mitochondrial morphologies. Scale bar: 20 μm. (B) Mitochondrial morphology quantification. WT cells show increase of mitochondrial shortening and fragmentation with H<sub>2</sub>O<sub>2</sub> treatment, while other cells mostly maintain original morphologies.

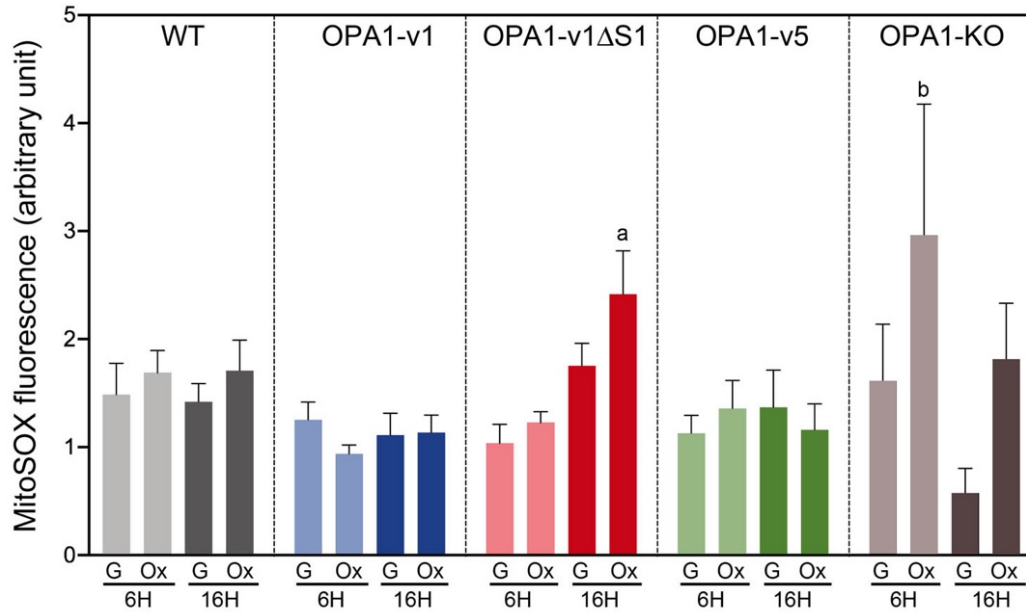

a:  $p=0.0485$  vs. OPA1-v1/16H/Ox;  $p=0.0439$  vs. OPA1-v5/16H/Ox  
 b:  $p=0.0017$  vs. OPA1-v1/6H/Ox;  $p=0.0088$  vs. OPA1-v1ΔS1/6H/Ox;  $p=0.0175$  vs. OPA1-v5/6H/Ox

**Supp Fig. S3. MitoSOX assays.** OPA1 variant cells, WT, and OPA1-KO cells were incubated glucose-containing (G) or glucose-free OXPHOS (Ox) media, and MitoSOX fluorescence was evaluated at 6 and 16 hours. One-way ANOVA, Turkey's multiple comparisons. Error bars, SEM.

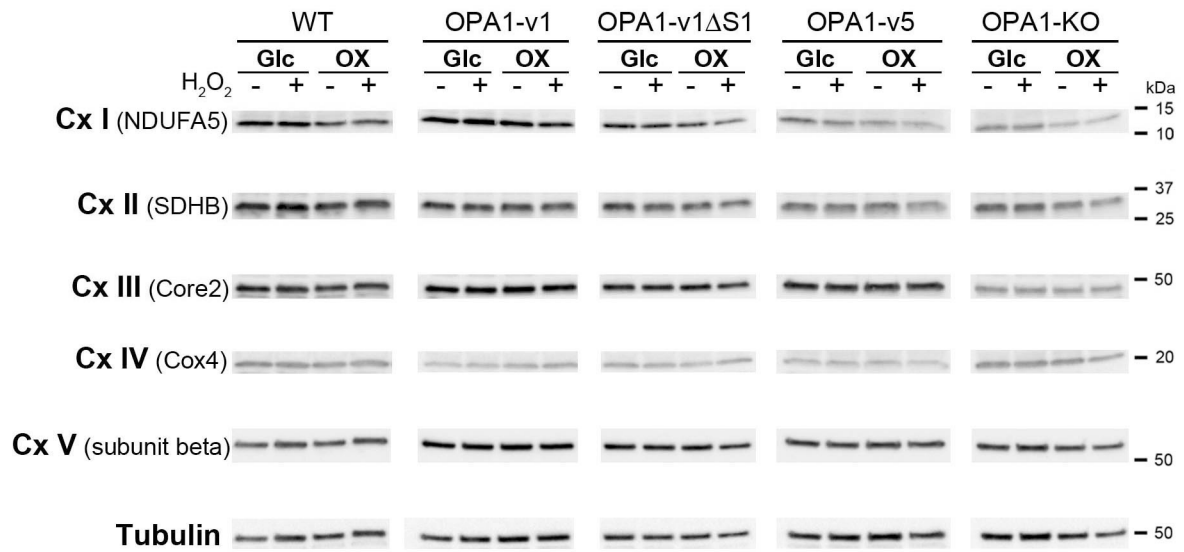

**Supp Fig. S4. Immunoblots for respiratory complex proteins.** Immunoblots for subunits of each respiratory complex in OPA1 variant cells treated with and without 500  $\mu$ M H<sub>2</sub>O<sub>2</sub> for 16 hours in glucose and OXPHOS conditions.

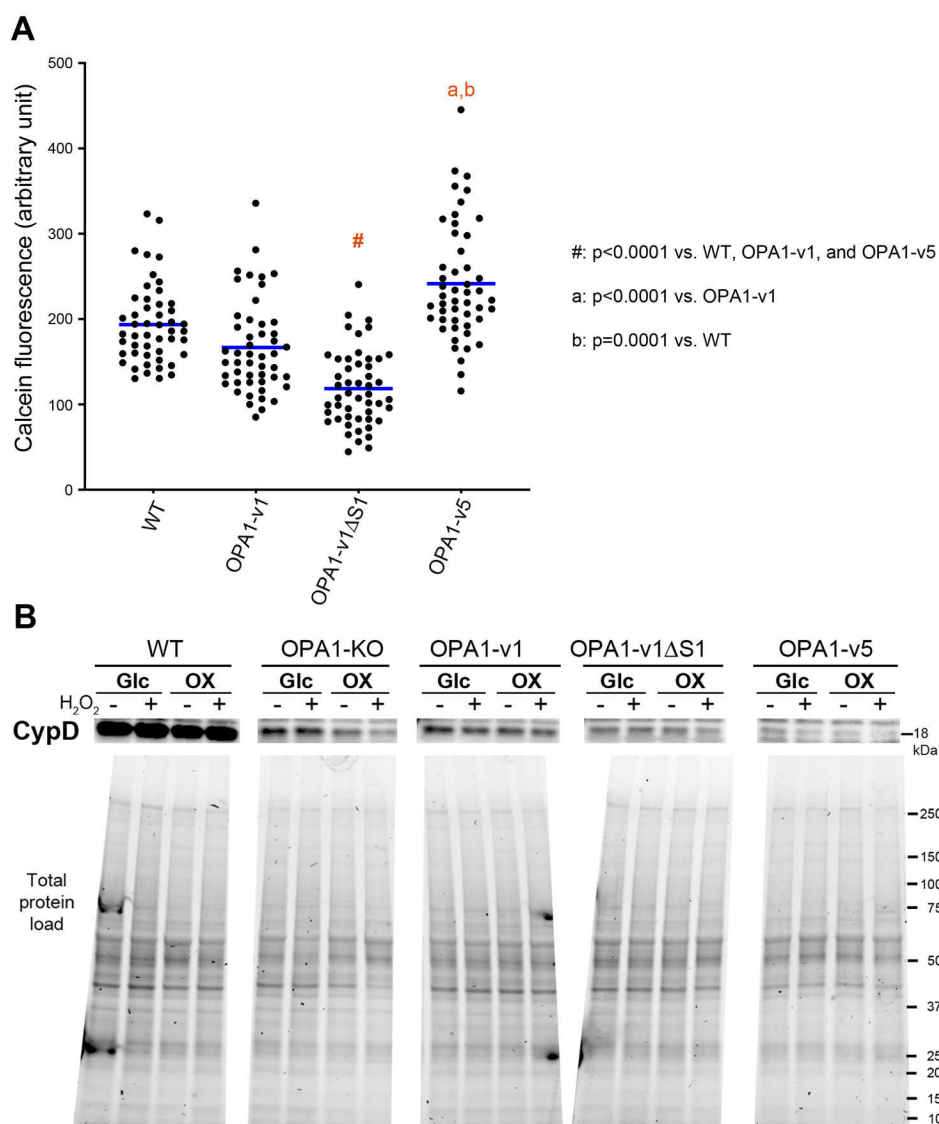

**Supp Fig. S5. Mitochondrial calcein fluorescence and CypD immunoblot.** (A) OPA1 variant cells along with WT cells were treated with 500  $\mu\text{M}$   $\text{H}_2\text{O}_2$  in OXPHOS conditions, and mitochondrial calcein fluorescence was evaluated after 16 hours. OPA1-v5 cells retained higher calcein fluorescence than other cells, indicating OPA1-v5 rendering reduced sensitivity to MPT.  $n = 49 - 50$ . One-way ANOVA with Turkey's multiple comparisons. Horizontal bars, mean. (B) CypD immunoblots of OPA1 variant cells treated with and without 500  $\mu\text{M}$   $\text{H}_2\text{O}_2$  for 16 hours in glucose and OXPHOS conditions.
